# Supplementary material for: On the conformation of UDP-Glc, a sugar nucleotide †
Source: Royal Society of Chemistry journal article supplement (doi:10.1039/a909389c), 2000-01-01
Supplement: a909389c.doc [file a909389c.doc]

# Supplementary data

**On the conformation of UDP-Glc, a sugar nucleotide**

**K. B. Kim,*a* E. C. Behrman,*b* C. E. Cottrell*c* and E. J. Behrman**a***

*a Department of Biochemistry, The Ohio State University, Columbus, OH 43210, USA*

*b Wichita State University, Department of Physics, Wichita, KS 67260, USA*

*c Campus Chemical Instrument Centre, The Ohio State University, Columbus, OH 43210, USA*

**Table S1** Cartesian coordinates for the 6-31G* minimum energy structure of UDP-Glc

| Atom | | *x* | *y* | *z* |  |  |  |  |  |
| --- | --- | --- | --- | --- | --- | --- | --- | --- | --- |
| N | 1 | 3.420609 | 2.080933 | 0.627747 | 40 | 2 | 3 | 4 |  |
| C | 2 | 4.735046 | 2.403748 | 0.862427 | 3 | 1 | 5 | 7 |  |
| C | 3 | 2.726013 | 1.292862 | 1.519089 | 2 | 1 | 6 | 37 |  |
| C | 4 | 2.738068 | 2.718491 | -0.499786 | 1 | 1 | 8 | 9 | 38 |
| N | 5 | 5.273438 | 1.842117 | 1.994247 | 9 | 2 | 10 | 39 |  |
| C | 6 | 3.267441 | 0.771683 | 2.624817 | 2 | 3 | 10 | 40 |  |
| O | 7 | 5.402985 | 3.110703 | 0.158798 | 7 | 2 |  |  |  |
| C | 8 | 1.832672 | 1.801743 | -1.310043 | 1 | 4 | 11 | 12 | 41 |
| O | 9 | 1.877365 | 3.711000 | -0.013733 | 6 | 4 | 13 |  |  |
| C | 10 | 4.654251 | 1.037170 | 2.937317 | 3 | 5 | 6 | 14 |  |
| O | 11 | 2.504959 | 0.981766 | -2.212646 | 6 | 8 | 42 |  |  |
| C | 12 | 0.921906 | 2.827103 | -1.962616 | 1 | 8 | 13 | 15 | 43 |
| C | 13 | 0.678543 | 3.774796 | -0.801666 | 1 | 9 | 12 | 16 | 44 |
| O | 14 | 5.276306 | 0.642593 | 3.888611 | 7 | 10 |  |  |  |
| O | 15 | 1.630325 | 3.501282 | -2.981155 | 6 | 12 | 45 |  |  |
| C | 16 | -0.507675 | 3.375336 | 0.078339 | 1 | 13 | 17 | 46 | 47 |
| O | 17 | -1.659180 | 3.313705 | -0.711731 | 6 | 16 | 18 |  |  |
| P | 18 | -2.679626 | 2.039047 | -0.627304 | 51 | 17 | 19 | 20 | 21 |
| O | 19 | -2.925629 | 1.700134 | 0.785141 | 6 | 18 |  |  |  |
| O | 20 | -3.742661 | 2.293930 | -1.601500 | 6 | 18 |  |  |  |
| O | 21 | -1.693314 | 0.869995 | -1.269211 | 6 | 18 | 22 |  |  |
| P | 22 | -0.765915 | -0.336288 | -0.807373 | 51 | 21 | 23 | 24 | 25 |
| O | 23 | 0.138214 | -0.686661 | -1.922653 | 6 | 22 |  |  |  |
| O | 24 | -0.167694 | -0.062851 | 0.536423 | 6 | 22 |  |  |  |
| O | 25 | -1.805954 | -1.570618 | -0.607285 | 6 | 22 | 26 |  |  |
| C | 26 | -2.735107 | -1.596268 | 0.433426 | 1 | 25 | 27 | 28 | 48 |
| C | 27 | -2.234390 | -2.467850 | 1.589417 | 1 | 26 | 29 | 31 | 49 |
| O | 28 | -3.927094 | -2.156326 | -0.039902 | 6 | 26 | 30 |  |  |
| C | 29 | -2.081253 | -3.900833 | 1.104400 | 1 | 27 | 32 | 34 | 50 |
| C | 30 | -3.861725 | -3.466965 | -0.554153 | 1 | 28 | 32 | 33 | 51 |
| O | 31 | -1.036743 | -2.059937 | 2.174896 | 6 | 27 | 52 |  |  |
| C | 32 | -3.389420 | -4.416611 | 0.542221 | 1 | 29 | 30 | 35 | 53 |
| C | 33 | -5.260620 | -3.770111 | -1.064392 | 1 | 30 | 36 | 54 | 55 |
| O | 34 | -1.687103 | -4.752029 | 2.160385 | 6 | 29 | 56 |  |  |
| O | 35 | -3.234955 | -5.706512 | -0.003021 | 6 | 32 | 57 |  |  |
| O | 36 | -6.236877 | -3.550018 | -0.081467 | 6 | 33 | 58 |  |  |
| H | 37 | 1.703247 | 1.085693 | 1.269791 | 5 | 3 |  |  |  |
| H | 38 | 3.512909 | 3.145584 | -1.109314 | 5 | 4 |  |  |  |
| H | 39 | 6.229843 | 2.068863 | 2.157883 | 28 | 5 |  |  |  |
| H | 40 | 2.694687 | 0.149094 | 3.280502 | 5 | 6 |  |  |  |
| H | 41 | 1.254166 | 1.201675 | -0.637054 | 5 | 8 |  |  |  |
| H | 42 | 1.917007 | 0.231842 | -2.335983 | 21 | 11 |  |  |  |
| H | 43 | 0.010986 | 2.399750 | -2.349258 | 5 | 12 |  |  |  |
| H | 44 | 0.560318 | 4.789230 | -1.158142 | 5 | 13 |  |  |  |
| H | 45 | 2.069977 | 2.826813 | -3.485229 | 21 | 15 |  |  |  |
| H | 46 | -0.314545 | 2.433502 | 0.569611 | 5 | 16 |  |  |  |
| H | 47 | -0.636505 | 4.123703 | 0.854691 | 5 | 16 |  |  |  |
| H | 48 | -2.979645 | -0.600128 | 0.764847 | 5 | 26 |  |  |  |
| H | 49 | -3.010223 | -2.446869 | 2.352142 | 5 | 27 |  |  |  |
| H | 50 | -1.327377 | -3.925247 | 0.323822 | 5 | 29 |  |  |  |
| H | 51 | -3.164658 | -3.512772 | -1.382874 | 5 | 30 |  |  |  |
| H | 52 | -0.639359 | -1.333221 | 1.676270 | 21 | 31 |  |  |  |
| H | 53 | -4.131241 | -4.439529 | 1.335693 | 5 | 32 |  |  |  |
| H | 54 | -5.452332 | -3.145416 | -1.933365 | 5 | 33 |  |  |  |
| H | 55 | -5.328979 | -4.807877 | -1.361862 | 5 | 33 |  |  |  |
| H | 56 | -0.971024 | -4.307831 | 2.599945 | 21 | 34 |  |  |  |
| H | 57 | -2.719498 | -6.206772 | 0.616257 | 21 | 35 |  |  |  |
| H | 58 | -6.074448 | -2.681808 | 0.268448 | 21 | 36 |  |  |  |

**Table S2** Cartesian coordinates for the C opt minimum energy structure of UDP-Glc

| Atom | | *x* | *y* | *z* |  |  |  |  |  |
| --- | --- | --- | --- | --- | --- | --- | --- | --- | --- |
| O | 1 | 1.781967 | 0.010864 | -3.033691 | 6 | 2 | 37 |  |  |
| C | 2 | 2.199265 | 0.297012 | -1.741943 | 1 | 1 | 3 | 4 | 38 |
| C | 3 | 3.589400 | -0.282562 | -1.498550 | 1 | 2 | 5 | 6 | 39 |
| C | 4 | 2.442230 | 1.788040 | -1.491531 | 1 | 2 | 7 | 8 | 40 |
| O | 5 | 4.378387 | -0.125916 | -2.646790 | 6 | 3 | 41 |  |  |
| C | 6 | 4.148865 | 0.634079 | -0.406082 | 1 | 3 | 7 | 9 | 42 |
| O | 7 | 3.436615 | 1.819916 | -0.468002 | 6 | 4 | 6 |  |  |
| C | 8 | 1.235413 | 2.592468 | -1.063080 | 1 | 4 | 10 | 43 | 44 |
| N | 9 | 4.019318 | 0.073288 | 0.957016 | 40 | 6 | 11 | 12 |  |
| O | 10 | 0.618469 | 1.941132 | 0.010071 | 6 | 8 | 13 |  |  |
| C | 11 | 2.872940 | 0.249374 | 1.704117 | 2 | 9 | 14 | 45 |  |
| C | 12 | 5.082123 | -0.629150 | 1.456345 | 3 | 9 | 15 | 16 |  |
| P | 13 | -0.866974 | 2.390854 | 0.515411 | 51 | 10 | 17 | 18 | 19 |
| C | 14 | 2.723557 | -0.236069 | 2.940765 | 2 | 11 | 20 | 46 |  |
| N | 15 | 4.913834 | -1.103806 | 2.730240 | 9 | 12 | 20 | 47 |  |
| O | 16 | 6.101608 | -0.828568 | 0.849045 | 7 | 12 |  |  |  |
| O | 17 | -0.938477 | 3.854233 | 0.591034 | 6 | 13 |  |  |  |
| O | 18 | -1.132034 | 1.520615 | 1.688095 | 6 | 13 |  |  |  |
| O | 19 | -1.795563 | 1.918213 | -0.730194 | 6 | 13 | 21 |  |  |
| C | 20 | 3.803345 | -0.976761 | 3.556320 | 3 | 14 | 15 | 22 |  |
| P | 21 | -1.928375 | 0.627823 | -1.691010 | 51 | 19 | 23 | 24 | 25 |
| O | 22 | 3.826584 | -1.461060 | 4.656403 | 7 | 20 |  |  |  |
| O | 23 | -3.316437 | 0.537369 | -2.167191 | 6 | 21 |  |  |  |
| O | 24 | -0.786484 | 0.594635 | -2.635208 | 6 | 21 |  |  |  |
| O | 25 | -1.640488 | -0.585266 | -0.625839 | 6 | 21 | 26 |  |  |
| C | 26 | -2.569275 | -0.882935 | 0.354950 | 1 | 25 | 27 | 28 | 48 |
| C | 27 | -1.899277 | -1.706314 | 1.456726 | 1 | 26 | 29 | 30 | 49 |
| O | 28 | -3.634583 | -1.637268 | -0.141464 | 6 | 26 | 31 |  |  |
| O | 29 | -0.746460 | -1.144196 | 1.990952 | 6 | 27 | 50 |  |  |
| C | 30 | -1.532135 | -3.080368 | 0.914978 | 1 | 27 | 32 | 33 | 51 |
| C | 31 | -3.285065 | -2.838150 | -0.783844 | 1 | 28 | 33 | 34 | 52 |
| O | 32 | -1.035675 | -3.914490 | 1.941528 | 6 | 30 | 53 |  |  |
| C | 33 | -2.725555 | -3.775330 | 0.278412 | 1 | 30 | 31 | 35 | 54 |
| C | 34 | -4.542709 | -3.284546 | -1.499863 | 1 | 31 | 36 | 55 | 56 |
| O | 35 | -2.344040 | -5.001770 | -0.296631 | 6 | 33 | 57 |  |  |
| O | 36 | -4.893982 | -2.374405 | -2.499588 | 6 | 34 |  |  |  |
| H | 37 | 0.820724 | 0.135666 | -3.053055 | 21 | 1 |  |  |  |
| H | 38 | 1.495422 | -0.084457 | -1.014694 | 5 | 2 |  |  |  |
| H | 39 | 3.577072 | -1.321579 | -1.188171 | 5 | 3 |  |  |  |
| H | 40 | 2.859161 | 2.231659 | -2.390762 | 5 | 4 |  |  |  |
| H | 41 | 3.783813 | -0.196900 | -3.386490 | 21 | 5 |  |  |  |
| H | 42 | 5.199432 | 0.805145 | -0.561966 | 5 | 6 |  |  |  |
| H | 43 | 0.560272 | 2.667633 | -1.904510 | 5 | 8 |  |  |  |
| H | 44 | 1.542480 | 3.588882 | -0.766830 | 5 | 8 |  |  |  |
| H | 45 | 2.095734 | 0.816208 | 1.231247 | 5 | 11 |  |  |  |
| H | 46 | 1.807953 | -0.097794 | 3.476944 | 5 | 14 |  |  |  |
| H | 47 | 5.686386 | -1.616669 | 3.095276 | 28 | 15 |  |  |  |
| H | 48 | -3.005478 | 0.014893 | 0.758270 | 5 | 26 |  |  |  |
| H | 49 | -2.651291 | -1.841141 | 2.235825 | 5 | 27 |  |  |  |
| H | 50 | -0.796432 | -0.178680 | 1.924881 | 21 | 29 |  |  |  |
| H | 51 | -0.766190 | -2.951248 | 0.156600 | 5 | 30 |  |  |  |
| H | 52 | -2.522385 | -2.656723 | -1.531189 | 5 | 31 |  |  |  |
| H | 53 | -0.377655 | -3.408691 | 2.404465 | 21 | 32 |  |  |  |
| H | 54 | -3.484512 | -3.946274 | 1.040771 | 5 | 33 |  |  |  |
| H | 55 | -5.346375 | -3.389877 | -0.770279 | 5 | 34 |  |  |  |
| H | 56 | -4.382248 | -4.250290 | -1.965607 | 5 | 34 |  |  |  |
| H | 57 | -1.743942 | -5.416000 | 0.310394 | 21 | 35 |  |  |  |
